# Supplementary material
Source: PubMed Central journal article supplement (PMC9527072)
Supplement: 11427_2022_2166_MOESM1_ESM.pdf [file 11427_2022_2166_MOESM1_ESM.pdf]

1 **Supplementary Material**

2 **Additional File 1 contains 3 Figures and 2 Tables**

3 **An Antibody Cocktail with Broadened Mutational**

4 **Resistance and Effective Protection Against SARS-CoV-2**

5 Chunyun Sun<sup>1</sup>†, Hang Chi<sup>2</sup>†, Fei Yuan<sup>3</sup>†, Jing Li<sup>1</sup>, Ji Yang<sup>1</sup>, Aihua  
6 Zheng<sup>3</sup>, Fei Wang<sup>1</sup>, Lingling Sun<sup>1</sup>, Yanjing Zhang<sup>1</sup>, Ping Hu<sup>1</sup>, Lihua Jiao<sup>1</sup>,  
7 Yongqiang Deng<sup>2\*</sup>, Liangzhi Xie<sup>1,4,5\*</sup>

8 <sup>1</sup> *Beijing Engineering Research Center of Protein and Antibody, Sinocelltech Ltd.,*  
9 *Beijing 100176, China*

10 <sup>2</sup> *Department of Virology, State Key Laboratory of Pathogen and Biosecurity, Beijing*  
11 *Institute of Microbiology and Epidemiology, AMMS, Beijing 100071, China*

12 <sup>3</sup> *State Key Laboratory of Integrated Management of Pest Insects and Rodents,*  
13 *Institute of Zoology, Chinese Academy of Sciences, 100101, Beijing, China.*

14 <sup>4</sup> *Beijing Key Laboratory of Monoclonal Antibody Research and Development, Sino*  
15 *Biological Inc., Beijing 100176, China*

16 <sup>5</sup> *Cell Culture Engineering Center, Chinese Academy of Medical Sciences & Peking*  
17 *Union Medical College, Beijing 100005, China*

18  
19 † These authors contributed equally to this work.

20 \* Corresponding Author:

21 Dr Liangzhi Xie, Email: LX@sinocelltech.com;

22 Dr Yongqiang Deng, Email: dengyq1977@126.com

23

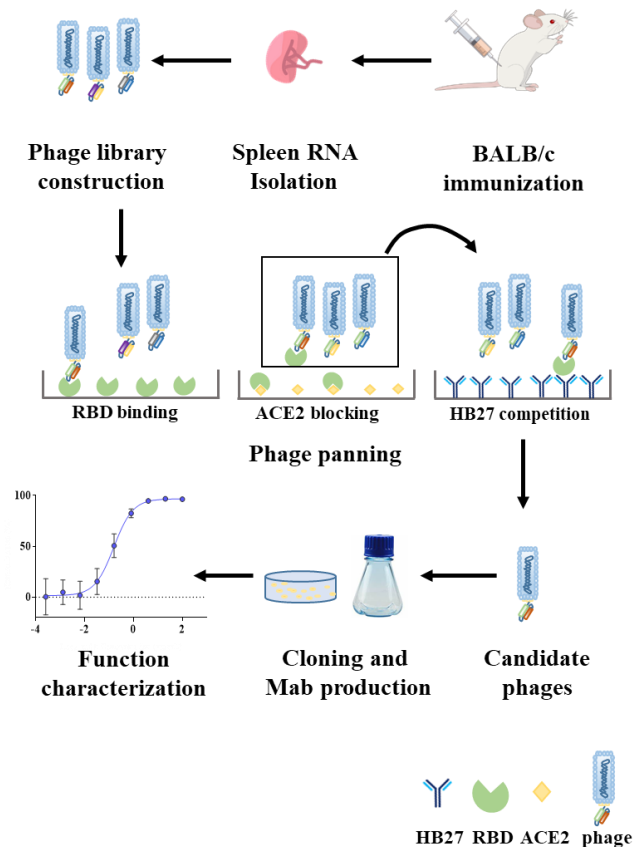

24

25 **Figure S1 Diagram of H89Y screening.** BALB/c mice were immunized with recombinant  
 26 SARS-CoV-2 RBD protein. Antibody variable regions (VH and VL) were amplified by RT-PCR,  
 27 and single-chain variable fragments (scFVs) were generated by linking VH and VL fragments and  
 28 cloned into a phage vector pComb3x for library construction. Phages displaying scFv were  
 29 harvested for several rounds of biopanning to screen scFvs positive for SARS-CoV-2 RBD  
 30 binding, ACE2-RBD interaction blocking and non-competitive binding of HB27 to RBD. The  
 31 selected phage clones were used as a template for amplification to obtain the light and heavy chain  
 32 variable region sequence and construct the expression vectors. Mouse-human chimeric antibodies  
 33 were produced in HEK293 cell.

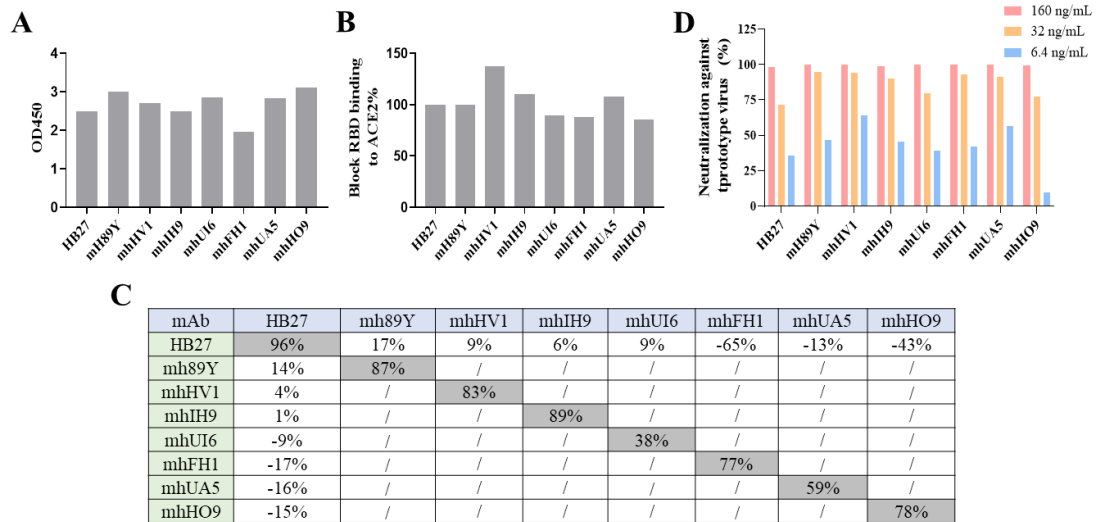

34

35 **Figure S2 Identification of leading antibody paired with HB27.** **A.** Binding of the candidate  
 36 antibodies to recombinant prototype RBD by ELISA. **B.** Blocking of prototype RBD binding to  
 37 ACE2 by HB27 and candidate antibodies by ELISA. **C.** Competing with HB27 for RBD binding  
 38 by ELISA. Each antibody was tested in two orientations: as a solid phase on the plate, and as a  
 39 liquid phase in solution. Grey shading blanks indicate the self-competing of the antibody. **D.** PsV  
 40 neutralization against the SARS-CoV-2 prototype strains in Vero E6 cells.

41

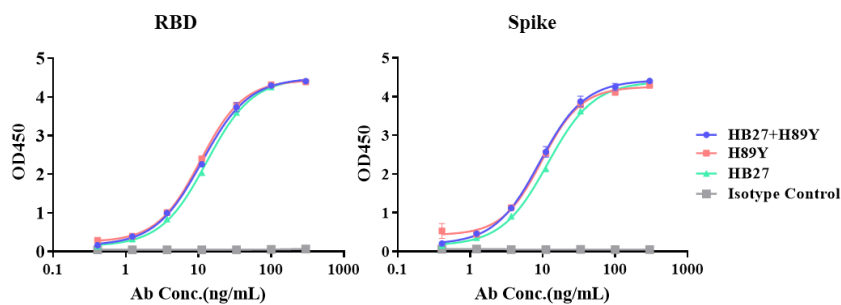

42

43 **Figure S3. HB27 and H89Y cocktail specific binding to RBD and spike protein.** Binding of  
 44 individual HB27, H89Y and the HB27+H89Y antibody cocktail to recombinant prototype RBD or  
 45 spike protein measured by ELISA. Isotype control was a non-spike targeting antibody with the Fc  
 46 LALA mutation.

47

**Table S1 HB27 and H89Y non-competitive binding to prototype SARS-CoV-2**

| Antigen              | Antibody 1<br>50 µg/mL | Response-1 | Antibody 2<br>100 µg/mL | Response-2 | Subtraction |
|----------------------|------------------------|------------|-------------------------|------------|-------------|
| Spike-his-<br>biotin | H89Y                   | 0.54       | HB27                    | 0.59       | 0.55        |
|                      | H89Y                   | 0.57       | H89Y                    | 0.04       |             |
|                      | HB27                   | 0.58       | H89Y                    | 0.54       | 0.51        |
|                      | HB27                   | 0.58       | HB27                    | 0.03       |             |
| RBD-his-<br>biotin   | H89Y                   | 3.76       | HB27                    | 1.99       | 1.53        |
|                      | H89Y                   | 3.81       | H89Y                    | 0.46       |             |
|                      | HB27                   | 3.45       | H89Y                    | 2.23       | 1.85        |
|                      | HB27                   | 3.81       | HB27                    | 0.38       |             |

48

49

50

**Table S2. NGS analysis from escape mutant screening**

| NGS results of P1 |     |     |                |            |             |            |                 |
|-------------------|-----|-----|----------------|------------|-------------|------------|-----------------|
| Location          | REF | ALT | Mutation Type  | HB27       | H89Y        | HB27+H89Y  | Isotype Control |
| P272P             | CCT | CCG | Synonymous     | 0/1, 29.9% | 0/0         | 0/0        | 0/0             |
| S477F             | TCT | TTT | Non-Synonymous | 0/0        | 0/1, 44.7%  | 0/0        | 0/0             |
| F486S             | TTC | TCC | Non-Synonymous | 0/0        | 0/1, 29.9%  | 0/0        | 0/0             |
| P499S             | CCT | TCT | Non-Synonymous | 0/1, 56.5% | 0/0         | 0/0        | 0/0             |
| R682Q             | CGG | CAG | Non-Synonymous | 0/1, 60.2% | 1/1, 73.2%  | 1/1, 89.8% | 0/1, 80.2%      |
| H1058H            | CAC | CAT | Synonymous     | 0/1, 62.4% | 0/1, 75.95% | 1/1, 90.5% | 0/1, 81.9%      |
| NGS results of P2 |     |     |                |            |             |            |                 |
| Location          | REF | ALT | Mutation Type  | HB27       | H89Y        | HB27+H89Y  | Isotype Control |
| V3M               | GTG | ATG | Non-Synonymous | 0/0        | 0/0         | 0/1, 17.6% | 0/0             |
| P272P             | CCT | CCG | Synonymous     | 0/1, 43.8% | 0/0         | 0/0        | 0/0             |
| S477F             | TCT | TTT | Non-Synonymous | 0/0        | 0/1, 74.0%  | 0/0        | 0/0             |
| F486S             | TTC | TCC | Non-Synonymous | 0/0        | 0/1, 18.8%  | 0/0        | 0/0             |
| R682Q             | CGG | CAG | Non-Synonymous | 0/1, 95.2% | 0/1, 95.4%  | 1/1, 95.6% | 0/1, 99.0%      |
| H1058H            | CAC | CAT | Synonymous     | 0/1, 97.6% | 0/1, 94%    | 1/1, 100%  | 0/1, 96.1%      |

51

52 NGS analysis of result of P1 and P2. 0/0= homozygous and is consistent with reference base

53 (REF); 0/1= heterozygous of two alleles, one is alternate base (ALT) and the other is REF; 1/1=

54 homozygous with both ALTs. The percentage represents the proportion of the number of ALT base

55 reads to total base reads. The alphabets highlighted in red represent the bases altered after

56 selection. Non-synonymous mutation such as R682Q was near the furin cleavage site and

57 spontaneously occurred during SARS-CoV-2 passage(Johnson et al., 2020; Lau et al., 2020).

58

59

60 **References**

- 61 Johnson, M. C., Lyddon, T. D., Suarez, R., Salcedo, B., LePique, M., Graham, M. and Ricana, C.  
62 (2020). Optimized Pseudotyping Conditions for the SARS-COV-2 Spike Glycoprotein. *J Virol* 94,  
63 e01062-01020.
- 64 Lau, S. Y., Wang, P., Mok, B. W., Zhang, A. J., Chu, H. and Lee, A. C. (2020). Attenuated SARS-CoV-2  
65 variants with deletions at the S1/S2 junction. *Emerg Microbes Infect* 9, 837-842.

66
